# Supplementary material
Source: Royal Society of Chemistry journal article supplement (doi:10.1039/d6qm00312e)
Supplement: d6qm00312e1.pdf [file d6qm00312e1.pdf]

## Supporting Information

### **Reviving and Upgrading Storage-Degraded Nickel-rich Cathode via Solid-State Electrolyte Coating**

*Jie Tan<sup>a,b</sup>, Sihan Li<sup>a</sup>, Yingfen Pan<sup>c</sup>, Yunhai Zhang<sup>a</sup>, Le Zhao<sup>a</sup>, Wenbo Wang<sup>d</sup>, Zhouhao Fu<sup>a</sup>, Qi Zhang<sup>a</sup>, Yougen Tang<sup>a</sup>, Haiyan Wang<sup>a\*</sup>*

<sup>a</sup>Hunan Provincial Key Laboratory of Chemical Power Sources, College of Chemistry and Chemical Engineering, Central South University, Changsha, 410083, P.R. China

<sup>b</sup> China Resources Recycling Battery Recycled Material (Hunan) Co., Ltd, Changsha, 410083, P.R. China

<sup>c</sup>Comprehensive Technology Service Center of Dongshan Customs, Dongshan 363400, P.R. China

<sup>d</sup>Jiangsu Yeeli Technology Co., Ltd, Yixing, 214201, P.R. China

E-mail addresses: wanghy419@csu.edu.cn (H. Wang).

## Results and Discussion

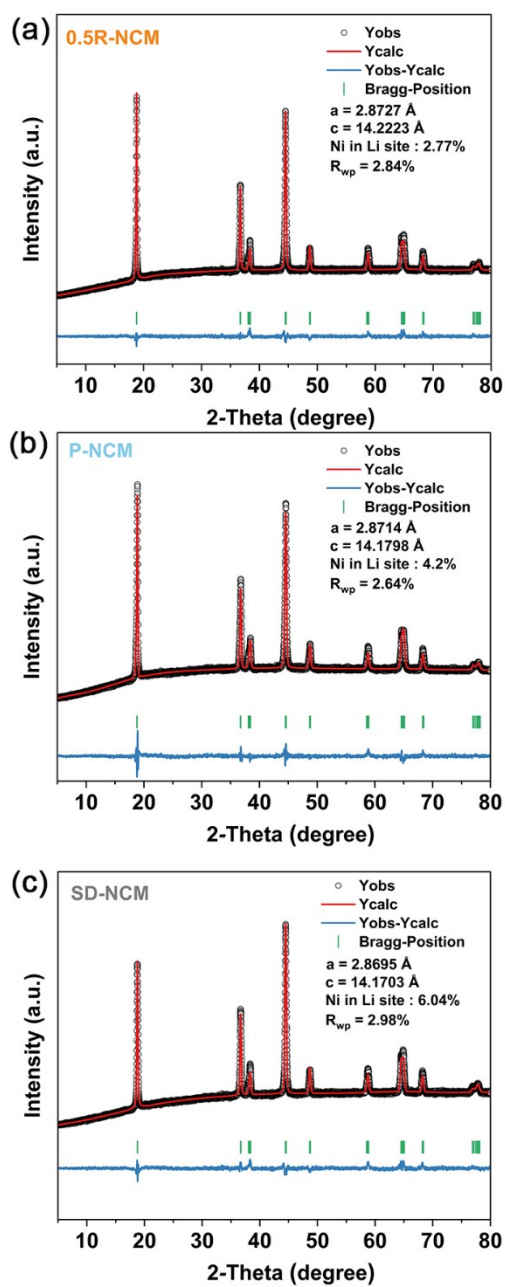

Figure S1. XRD patterns and Rietveld refinement results of (a) SD-NCM, (b) P-NCM and (c) 0.5R-NCM.

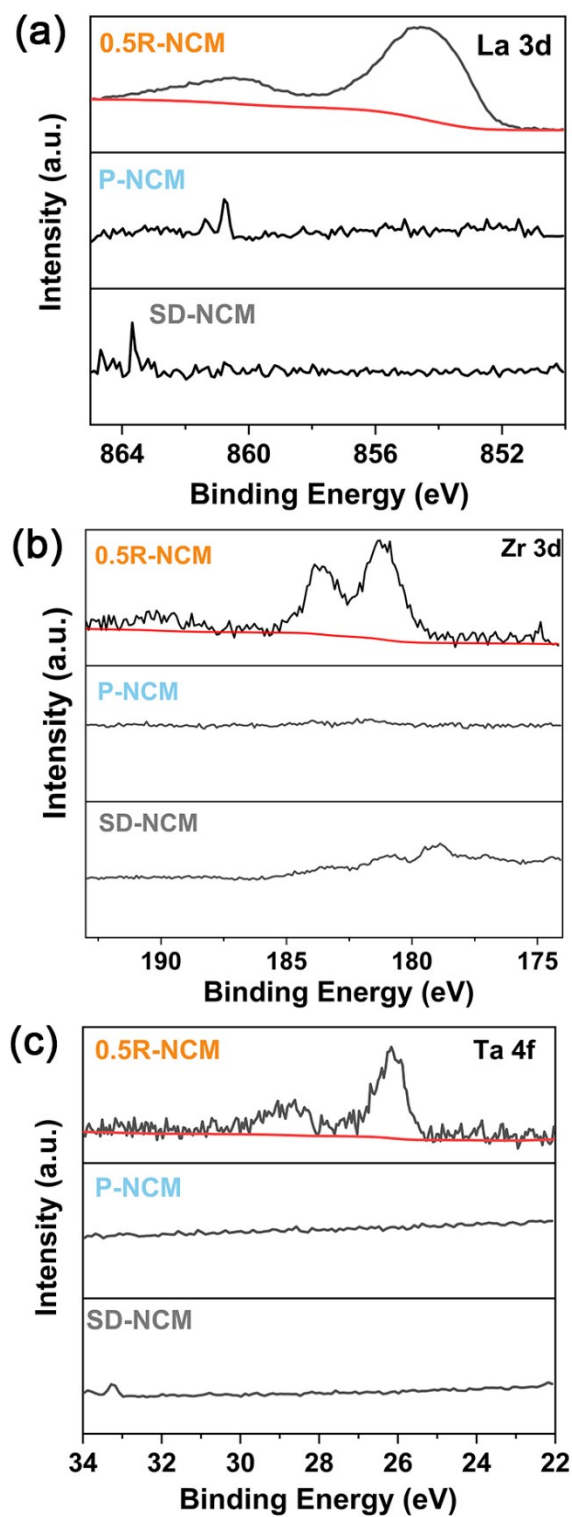

Figure S2. XPS spectra of (a) La 3d, (b) Zr 3d and (c) Ta 4f of SD-NCM, P-NCM and 0.5R-NCM.

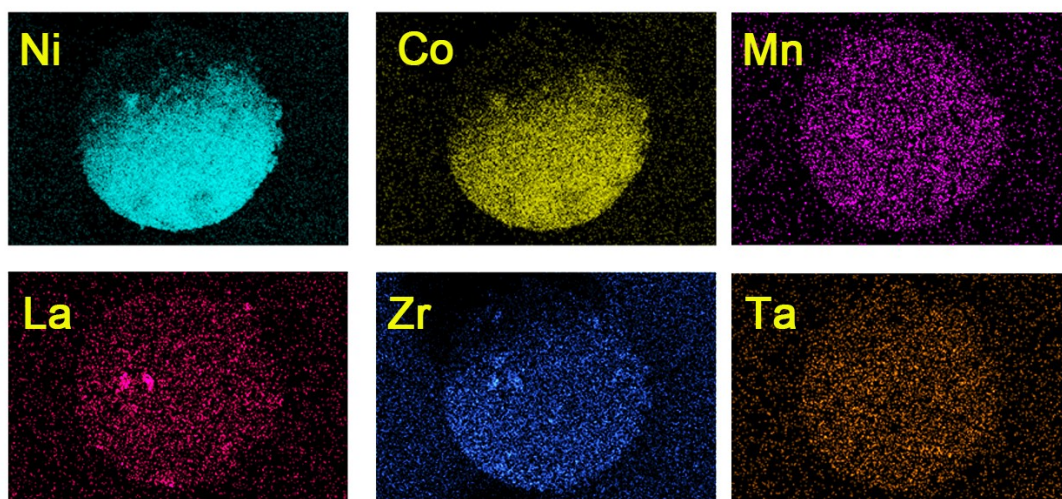

Figure S3. EDS mapping of 0.5R-NCM.

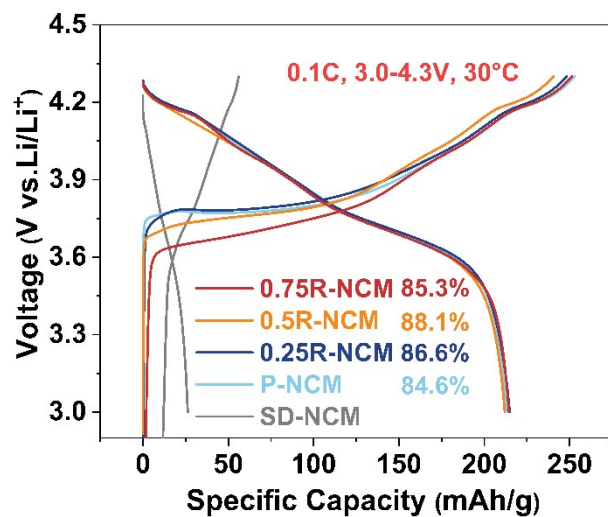

Figure S4. The initial charge-discharge profiles at 0.1 C between 3.0 and 4.3 V.

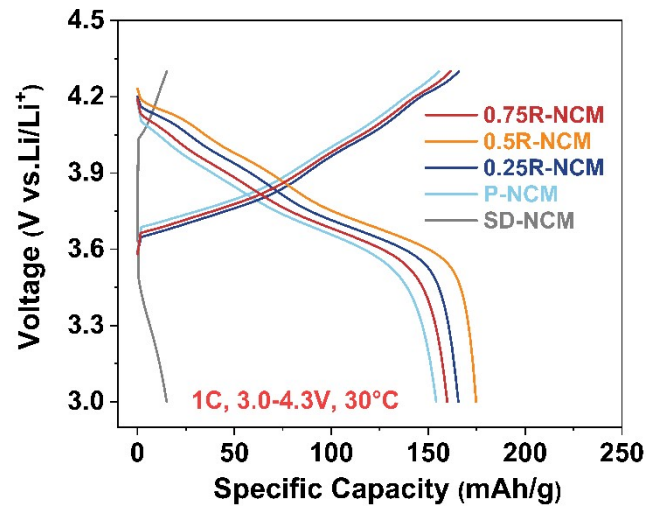

Figure S5. The charge-discharge profiles at 100 cycles.

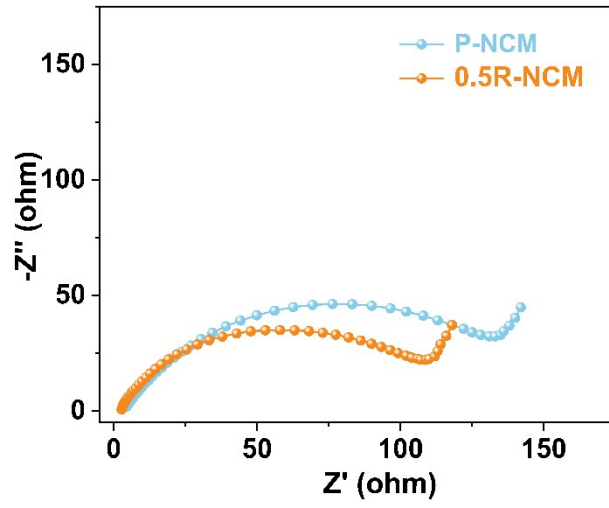

Figure S6. EIS spectra of cathodes before the test.

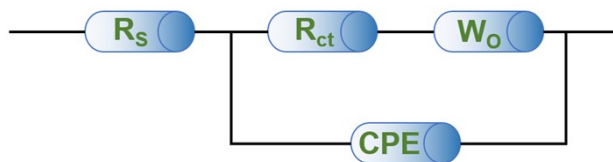

Figure S7. Equivalent electrical circuits of half-cell before cycle.

Note:  $R_s$  (Solution Resistance);  $R_{ct}$  (Charge Transfer Resistance);  $W_o$  (Warburg

Impedance); CPE (Constant Phase Element).

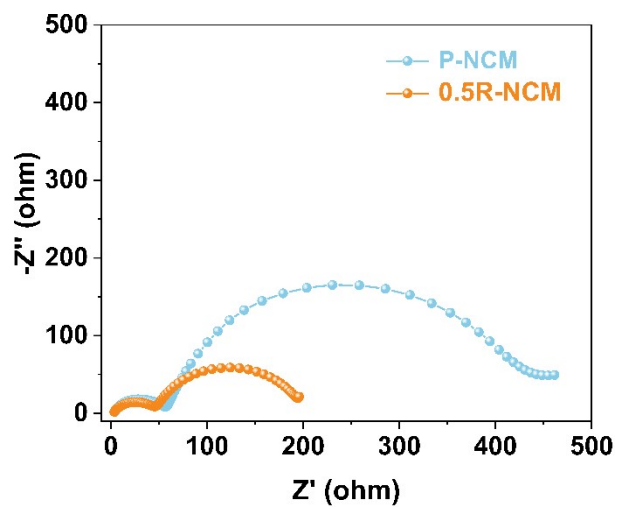

Figure S8. EIS spectra of cathodes after 100 cycles.

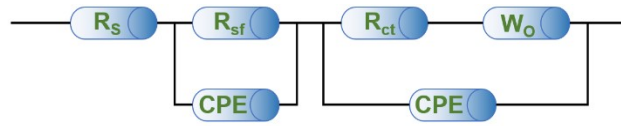

Figure S9. Equivalent electrical circuits of half-cell before cycle.

Note:  $R_{sf}$  (interfacial film resistance).

Table S1 Corresponding parameters obtained from the Nyquist plots.

| Samples  | Before test |          | after 100 cycles at 1C |          |          |
|----------|-------------|----------|------------------------|----------|----------|
|          | $R_s$       | $R_{ct}$ | $R_s$                  | $R_{sf}$ | $R_{ct}$ |
| P-NCM    | 6.1         | 133.3    | 5.2                    | 56.1     | 393.5    |
| 0.5R-NCM | 3.2         | 107.8    | 4.5                    | 44.6     | 148.3    |
